# Supplementary material for: Feasibility of Integrating Panel-Based Pharmacogenomics Testing for Chemotherapy and Supportive Care in Patients With Colorectal Cancer
Source: PubMed Central journal article supplement — Technol Cancer Res Treat. 2019 Sep 18;18:1533033819873924. doi: 10.1177/1533033819873924 (PMC6753511; doi:10.1177/1533033819873924), 2019-09-18
Supplement: OneOme_sample_comprehensive_report.pdf [file OneOme_sample_comprehensive_report.pdf]

# OneOme RightMed® comprehensive test report overview

The RightMed comprehensive test is a pharmacogenomic test (also called a medication response test) that analyzes a patient's DNA to determine how he or she may respond to hundreds of medications. The RightMed comprehensive test report contains all of the patient's results and may be used to guide a healthcare provider's prescription decisions.

## WHAT INFORMATION IS INCLUDED IN THE RIGHTMED COMPREHENSIVE TEST REPORT?

The RightMed comprehensive test report contains a lot of valuable information, including: A

- legend of the icons used throughout the report to help you interpret the results
- If applicable, a personalized medication summary of results for any medications entered during the order process as most relevant to the patient, with these medications additionally highlighted in the body of the report
- Medications organized by medical specialty and classified based on how severe the patient's predicted gene-drug interaction is (major, moderate, minimal, or limited pharmacogenetic impact)
- The patient's genotype and their predicted metabolic status across each gene
- The patient's analytical test results

## HOW DO I ORDER A RIGHTMED COMPREHENSIVE TEST?

Providers can go to [portal.oneome.com](https://portal.oneome.com) to place their first order or can download our test requisition form at [www2.oneome.com/order-form](https://www2.oneome.com/order-form). Patients can purchase a test at [oneome.com/buy-test](https://oneome.com/buy-test) (an independent provider will order the test for you, if appropriate) or you can discuss the test with your doctor.

## DO YOU OFFER SUPPORT WITH INTERPRETING RESULTS?

If you are a provider or pharmacist, we offer one-on-one consultations with pharmacogenomic experts. Contact [support@oneome.com](mailto:support@oneome.com) to set up a consultation.

In addition to consultations, providers also get access to the RightMed Advisor, an online, interactive tool which provides further insights into a patient's results. Learn more at [oneome.com/rightmed-advisor](https://oneome.com/rightmed-advisor).

If you are a patient and you purchase the test on OneOme's website, a consult with a genetic counselor is included in the cost of the test. If your doctor orders the test for you, please refer them to the information above.

## DOES ONEOME OFFER OTHER REPORTS?

In addition to the comprehensive test report, providers can get access to specialty reports (for specialty areas like oncology or psychiatry), RightMed custom reports (with a subset of medications selected by the provider's institution), and RightMed Advisor reports (with more in-depth information on a subset of medications selected by the provider for an individual patient). Learn more at [oneome.com/rightmed-reports](https://oneome.com/rightmed-reports).

## I HAVE A QUESTION; WHO SHOULD I CONTACT?

We'd love to help. Please contact our customer support team at [844-ONEOME-5](tel:844-ONEOME-5) (844-663-6635) or [support@oneome.com](mailto:support@oneome.com). The team will put you in touch with the right person.

# RightMed® comprehensive test report

The RightMed comprehensive test is a pharmacogenomic test that identifies how a patient's DNA affects their response to hundreds of medications. This report can be used to help determine safer, more effective medications and doses tailored to a patient's genomic profile.

## Patient and report summary

Patient name: Jane Doe

Patient date of birth: 1972-07-08

OneOme report date: 2019-01-16

Ordering provider: Sample Doctor

Ordering facility: Healthcare Institution

Product type: Comprehensive

Report type: Original

## Report legend

Based on this patient's genetic profile, medications are reported according to genotype-predicted interactions described below.

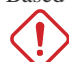

Major gene-drug interaction

Major genotype-drug interaction identified that affects the metabolism of the medication and/or indicates an elevated risk of adverse reaction or loss of efficacy.

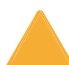

Moderate gene-drug interaction

Moderate genotype-drug interaction identified that affects the metabolism of the medication and/or indicates an elevated risk of adverse reaction or loss of efficacy.

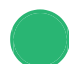

Minimal gene-drug interaction

Minimal genotype-drug interaction identified that does not significantly affect medication metabolism or predict an elevated risk of adverse reaction or loss of efficacy.

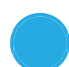

Limited pharmacogenetic impact

No pharmacogenetic variants demonstrate a significant impact on medication response. Other types of genetic tests that may guide prescribing (e.g., tumor marker testing, diagnostic, or indication-establishing testing) are not taken into account.

## Icon legend

Some medications are reported with icons to indicate that specific clinical annotations and/or dosing guidelines provided by FDA, CPIC, or other professional associations are available in the RightMed Advisor.

|  |                        |                                                                                                                                                                    |
|--|------------------------|--------------------------------------------------------------------------------------------------------------------------------------------------------------------|
|  | Increased exposure     | Total exposure to active compound(s) may be increased. Monitor for adverse effects.                                                                                |
|  | Decreased exposure     | Total exposure to active compound(s) may be decreased. Monitor for lack of therapeutic response. Difficult                                                         |
|  | to predict             | Total exposure to active compound(s) is difficult to predict. Monitor patient response.                                                                            |
|  | Reduced response       | Response to medication may be lowered due to genetic changes impacting mechanisms other than exposure (e.g. receptor function).                                    |
|  | Additional testing     | According to FDA labeling, additional laboratory testing may be indicated.                                                                                         |
|  | Professional guideline | Medication has professional guidelines associated with this patient's genetic test results. Avoidance, dose adjustment, or heightened monitoring may be indicated. |

## Personalized medication report summary

This list was generated from the medications entered during the order process. Providers can find more information about each medication in the Personalized medication report or in the RightMed Advisor.

Note: The associated genes listed for each medication do not imply that a specific gene-drug interaction exists, as some genes may only be informative in nature.

| Medication                                       | PGx result                                                                                                              | Overview                                                                                                                                                                                                                                                                                                                                                                                                                      | Associated gene(s)                  |
|--------------------------------------------------|-------------------------------------------------------------------------------------------------------------------------|-------------------------------------------------------------------------------------------------------------------------------------------------------------------------------------------------------------------------------------------------------------------------------------------------------------------------------------------------------------------------------------------------------------------------------|-------------------------------------|
| <b>Carbamazepine</b><br>(Carbatrol,<br>Tegretol) | <br>Major gene-drug<br>interaction     | <ul style="list-style-type: none"> <li>→ Normal metabolism of carbamazepine predicted.</li> <li>→ Normal exposure to carbamazepine predicted. Negative for the presence of the HLA-B*15:02 allele.</li> <li>• Increased risk of hypersensitivity reactions related to HLA-A*31:01 genotype.</li> <li>📖 Professional guidelines exist for the use of carbamazepine in patients with this genotype and/or phenotype.</li> </ul> | CYP3A5<br>HLA-A<br>HLA-B            |
| <b>Citalopram</b><br>(Celexa)                    | <br>Major gene-drug<br>interaction     | <ul style="list-style-type: none"> <li>↑ Increased metabolism of citalopram predicted.</li> <li>☐ Decreased exposure to citalopram predicted.</li> <li>• Typical to increased expression of the SLC6A4 transporter.</li> <li>📖 Professional guidelines exist for the use of citalopram in patients with this genotype and/or phenotype.</li> </ul>                                                                            | CYP2C19<br>GRIK4<br>HTR2A<br>SLC6A4 |
| <b>Phenytoin</b><br>(Dilantin)                   | <br>Major gene-drug<br>interaction   | <ul style="list-style-type: none"> <li>↓ Reduced metabolism of phenytoin predicted. Increased exposure to phenytoin predicted. Negative for the presence of the HLA-B*15:02 allele.</li> <li>• Increased risk of hypersensitivity reactions related to HLA-A*31:01 genotype.</li> <li>📖 Professional guidelines exist for the use of phenytoin in patients with this genotype and/or phenotype.</li> </ul>                    | CYP2C9<br>HLA-A<br>HLA-B            |
| <b>Bupropion</b><br>(Wellbutrin)                 | <br>Minimal gene-drug<br>interaction | <ul style="list-style-type: none"> <li>→ Normal metabolism of bupropion predicted.</li> <li>☑ Normal exposure to bupropion predicted.</li> <li>• Allele(s) have demonstrated substrate-specific function with bupropion, therefore cytochrome P450 phenotype may differ from bupropion-specific phenotype.</li> </ul>                                                                                                         | CYP2B6                              |
| <b>Fluoxetine</b><br>(Prozac, Sarafem)           | <br>Minimal gene-drug<br>interaction | <ul style="list-style-type: none"> <li>☑ Normal exposure to fluoxetine predicted.</li> <li>• Typical to increased expression of the SLC6A4 transporter.</li> </ul>                                                                                                                                                                                                                                                            | CYP2C9<br>CYP2D6<br>SLC6A4          |

## Genotype-predicted interactions for medications

## Allergy/Pulmonology

Major gene-drug interaction

Moderate gene-drug interaction

Minimal gene-drug interaction

Limited pharmacogenetic impact

- Dextromethorphan 1 (Delsym®)
- Indacaterol 1, 78 (Arcapta®)
- Loratadine 229 (Claritin®)
- Salmeterol 1 (Serevent®)
- Sildenafil 1 (Revatio®, Viagra®)
- Tadalafil 1 (Adcirca®, Cialis®)

- Montelukast (Singulair®)

## Analgesic/Anesthesiology

Major gene-drug interaction

Moderate gene-drug interaction

Minimal gene-drug interaction

Limited pharmacogenetic impact

- Morphine [i](#) 14, 20, 25, 26, 100, 106, 167, 183, 184, 197 (Kadian®, MS Contin®)

- Alfentanil [i](#) 1, 46, 89, 99, 142, 154 (Alfenta®)
- Carisoprodol [+](#) 49 (Soma®)
- Fentanyl [i](#) 1, 44, 53, 69, 92, 102, 198, 223, 228, 234, 235, 236 (Duragesic®, Sublimaze®)
- Ketamine [+](#) 1, 108, 109, 161, 225 (Ketalar®)

- Buprenorphine 1 (Buprenex®, BuTrans®, Subutex®)
- Codeine [i](#) 2, 9, 20, 34, 35, 185, 199
- Cyclobenzaprine 1, 217 (Flexeril®)
- Hydrocodone 1, 34, 35 (Hysingla®, Zohydro®)
- Methadone 1 (Dolophine®, Methadose®)
- Midazolam 1, 204 (Versed®)
- Oxycodone 1, 34, 35 (Oxycontin®, Roxicodone®)
- Tramadol [i](#) 1, 2, 34, 35, 113, 189, 192, 205 (Ultram®)

- Naloxone (Evezio®, Narcan®)

## Anti-inflammatory

Major gene-drug interaction

Moderate gene-drug interaction

Minimal gene-drug interaction

Limited pharmacogenetic impact

- Celecoxib [+](#) (Celebrex®)
- Diclofenac [+](#) (Voltaren®)
- Flurbiprofen [+](#) 1, 193 (Ansaid®)

Anti-inflammatory (cont.)

Major gene-drug interaction

Moderate gene-drug interaction

Minimal gene-drug interaction

Limited pharmacogenetic impact

- Meloxicam +1  
(Mobic®)
- Piroxicam +1  
(Feldene®)

Anticoagulant/Antiplatelet

Major gene-drug interaction

Moderate gene-drug interaction

Minimal gene-drug interaction

Limited pharmacogenetic impact

- Clopidogrel +1, 175, 176  
(Plavix®)
- Warfarin 1, 23, 75, 76  
(Coumadin®, Jantoven®)

- Apixaban 1  
(Eliquis®)
- Cilostazol 1, 204  
(Pletal®)
- Ticagrelor 1  
(Brilinta®)

- Dalteparin  
(Fragmin®)
- Enoxaparin  
(Lovenox®)
- Prasugrel  
(Effient®)
- Tirofiban  
(Aggrastat®)

Cardiovascular

Major gene-drug interaction

Moderate gene-drug interaction

Minimal gene-drug interaction

Limited pharmacogenetic impact

- Labetalol -24  
(Trandate®)

- Azilsartan +1  
(Edarbi®)
- Fluvastatin +1  
(Lescol®)
- Guanabenz -32  
(Wytensin®)
- Irbesartan +1  
(Avapro®)
- Losartan +1  
(Cozaar®)

- Aliskiren 1  
(Tekturna®)
- Amiodarone 1  
(Cordarone®, Pacerone®)
- Amlodipine 1  
(Norvasc®)
- Atorvastatin 1  
(Lipitor®)
- Carvedilol 1  
(Coreg®)
- Clonidine 1  
(Catapres®, Kapvay®)
- Diltiazem 1, 204  
(Cardizem®, Cartia®)
- Disopyramide 1  
(Norpace®)
- Dofetilide 1  
(Tikosyn®)
- Dronedarone 1, 204  
(Multaq®)
- Eplerenone 1  
(Inspra®)
- Felodipine 1  
(Plendil®)
- Flecainide 1, 2  
(Tambocor®)

- Alirocumab  
(Praluent®)
- Colesevelam  
(Welchol®)
- Digoxin  
(Digitek®, Digox®, Lanoxin®)
- Gemfibrozil  
(Lopid®)
- Lisinopril  
(Prinivil®, Zestril®)
- Nitroglycerin  
(Minitran®, Nitrostat®)
- Sotalol  
(Betapace®, Sorine®)
- Spironolactone  
(Aldactone®)
- Telmisartan  
(Micardis®)

## Cardiovascular (cont.)

Major gene-drug interaction

Moderate gene-drug interaction

Minimal gene-drug interaction

Limited pharmacogenetic impact

- Lidocaine 38, 145  
(Xylocaine®)
- Lomitapide 1   
(Juxtapid®)
- Lovastatin 1  
(Mevacor®)
- Metoprolol 1, 2  
(Lopressor®, Toprol XL®)
- Nifedipine 1, 204  
(Adalat®, Nifedical®, Procardia®)
- Nisoldipine 1, 204  
(Sular®)
- Pravastatin 1, 137  
(Pravachol®)
- Propafenone 1, 2  
(Rythmol®)
- Propranolol 1  
(Inderal®)
- Quinidine 1  
(Quin-G®)
- Ranolazine 1  
(Ranexa®)
- Simvastatin 1, 97, 159, 177, 204, 219  
(Zocor®)
- Timolol 211  
(Blocadren®)
- Verapamil 1, 204  
(Calan®, Verelan®)

## Endocrinology

Major gene-drug interaction

Moderate gene-drug interaction

Minimal gene-drug interaction

Limited pharmacogenetic impact

- Chlorpropamide   182
  - Glimepiride    
(Amaryl®)
  - Glipizide   1, 90, 95, 201  
(Glucotrol®)
  - Glyburide    
(Diabeta®, Micronase®)
  - Nateglinide   
(Starlix®)
  - Tolbutamide 
- Ethinyl estradiol 1, 2
- Ibandronate  
(Boniva®)
  - Insulin aspart  
(Novolog®)
  - Insulin aspart protamine/  
Insulin aspart  
(Novolog mix®)
  - Insulin aspart/Insulin  
degludec  
(Ryzodeg 70/30®)
  - Insulin degludec  
(Tresiba®)
  - Insulin detemir  
(Levemir®)
  - Insulin glargine  
(Lantus®, Toujeo®)

Endocrinology (cont.)

| Major gene-drug interaction | Moderate gene-drug interaction | Minimal gene-drug interaction | Limited pharmacogenetic impact                                                                                                                                                                                                                                                                                                                                                                                                                                                                                                                                                                                     |
|-----------------------------|--------------------------------|-------------------------------|--------------------------------------------------------------------------------------------------------------------------------------------------------------------------------------------------------------------------------------------------------------------------------------------------------------------------------------------------------------------------------------------------------------------------------------------------------------------------------------------------------------------------------------------------------------------------------------------------------------------|
|                             |                                |                               | <ul style="list-style-type: none"> <li>Insulin glulisine (Apidra®)</li> <li>Insulin lispro (Humalog®)</li> <li>Insulin lispro protamine/ Insulin lispro (Humalog mix®)</li> <li>Insulin NPH (Humulin N®, Novolin N®)</li> <li>Insulin NPH/Insulin regular (Humulin 70/30®, Novolin 70/30®)</li> <li>Insulin regular (Humulin R®, Novolin R®)</li> <li>Insulin regular (oral inhalation) (Afrezza®)</li> <li>Levothyroxine (Levoxyl®, Synthroid®)</li> <li>Metformin (Fortamet®, Glucophage®)</li> <li>Pamidronate (Aredia®)</li> <li>Risedronate (Actonel®, Atelvia®)</li> <li>Vasopressin (Vasotrist®)</li> </ul> |

Gastroenterology

| Major gene-drug interaction                                                                                                                                                             | Moderate gene-drug interaction                                                                                                                               | Minimal gene-drug interaction                                                                                                                                                                                           | Limited pharmacogenetic impact |
|-----------------------------------------------------------------------------------------------------------------------------------------------------------------------------------------|--------------------------------------------------------------------------------------------------------------------------------------------------------------|-------------------------------------------------------------------------------------------------------------------------------------------------------------------------------------------------------------------------|--------------------------------|
| <ul style="list-style-type: none"> <li>Esomeprazole (Nexium®) 2</li> <li>Lansoprazole (Prevacid®) 2, 134</li> <li>Omeprazole (Prilosec®) 2</li> <li>Pantoprazole (Protonix®)</li> </ul> | <ul style="list-style-type: none"> <li>Dexlansoprazole (Dexilant®) +</li> <li>Dronabinol (Marinol®, Syndros®) +</li> <li>Rabeprazole (Aciphex®) +</li> </ul> | <ul style="list-style-type: none"> <li>Aprepitant 1, 127 (Cinvanti®, Emend®)</li> <li>Dolasetron 1 (Anzemet®)</li> <li>Fosaprepitant 1, 127 (Emend Injection®)</li> <li>Ondansetron 1, 15, 79, 207 (Zofran®)</li> </ul> |                                |

Genetic disease

| Major gene-drug interaction | Moderate gene-drug interaction | Minimal gene-drug interaction                                              | Limited pharmacogenetic impact                                         |
|-----------------------------|--------------------------------|----------------------------------------------------------------------------|------------------------------------------------------------------------|
|                             |                                | <ul style="list-style-type: none"> <li>Eliglustat 1 (Cerdelga®)</li> </ul> | <ul style="list-style-type: none"> <li>Sapropterin (Kuvan®)</li> </ul> |

Genetic disease (cont.)

Major gene-drug interaction

Moderate gene-drug interaction

Minimal gene-drug interaction

Limited pharmacogenetic impact

- Major gene-drug interaction

- Moderate gene-drug interaction

- Ivacaftor 1 (Kalydeco®)

- Sodium phenylbutyrate (Buphenyl®)
- Velaglucerase alfa (Vpriv®)

Hematology/Oncology

Major gene-drug interaction

Moderate gene-drug interaction

Minimal gene-drug interaction

Limited pharmacogenetic impact

- Mercaptopurine 2, 164, 165 (Purixan®)
- Thioguanine 2, 164, 165 (Tabloid®)

- Bortezomib (Velcade®)

- Axitinib 1 (Inlyta®)
- Belinostat 1, 216 (Beleodaq®)
- Bosutinib 1 (Bosulif®)
- Brentuximab vedotin (Adcetris®)
- Cabazitaxel 1 (Jevtana®)
- Capecitabine 1, 2, 22 (Xeloda®)
- Crizotinib 1 (Xalkori®)
- Dasatinib 1 (Sprycel®)
- Docetaxel 1 (Docetaxel®, Taxotere®)
- Enzalutamide 1 (Xtandi®)
- Erlotinib 1, 73 (Tarceva®)
- Etoposide 1, 238 (Toposar®)
- Everolimus 1, 204 (Afinitor®, Zortress®)
- Exemestane (Aromasin®)
- Fluorouracil 1, 2, 22 (Adrucil®)
- Gefitinib 1 (Iressa®)
- Ifosfamide 1, 27 (Ifex®)
- Imatinib 1 (Gleevec®)
- Irinotecan 1, 47, 96 (Camptosar®)

- Afatinib 1 (Gilotrif®)
- Alemtuzumab (Campath®, Lemtrada®)
- Darbepoetin alfa (Aranesp®)
- Epoetin alfa (Epogen®, Procrit®)
- Ibritumomab (Zevalin®)
- Obinutuzumab (Gazyva®)
- Ofatumumab (Arzerra®)
- Panitumumab (Vectibix®)
- Pertuzumab (Perjeta®)



Hematology/Oncology (cont.)

Major gene-drug interaction

Moderate gene-drug interaction

Minimal gene-drug interaction

Limited pharmacogenetic impact

- Ixabepilone 1  
(Ixemptra®)
- Lapatinib 1, 174  
(Tykerb®)
- Methotrexate 1, 158, 160, 203, 233  
(Rheumatrex®)
- Nilotinib 1, 4  
(Tasigna®)
- Paclitaxel 1  
(Abraxane®)
- Pazopanib 1  
(Votrient®)
- Ponatinib 1  
(Iclusig®)
- Regorafenib 1  
(Stivarga®)
- Ruxolitinib 1  
(Jakafi®)
- Sorafenib 1  
(Nexavar®)
- Sunitinib 1  
(Sutent®)
- Tamoxifen 1, 2, 48  
(Soltamox®)
- Temsirolimus 1  
(Torisel®)
- Teniposide 98, 166  
(Vumon®)
- Trabectedin 1  
(Yondelis®)
- Vemurafenib 1  
(Zelboraf®)
- Vincristine 1, 204  
(Vincasar®)
- Vinorelbine 1  
(Navelbine®)

Immunosuppression

Major gene-drug interaction

Moderate gene-drug interaction

Minimal gene-drug interaction

Limited pharmacogenetic impact

- Azathioprine 1, 2, 110, 164, 165  
(Imuran®)
- Cyclosporine 1  
(Gengraf®, Neoral®, Sandimmune®)
- Everolimus 1, 204  
(Afinitor®, Zortress®)
- Sirolimus 1  
(Rapamune®)
- Mycophenolate sodium  
(Myfortic®)

Immunosuppression (cont.)

Major gene-drug interaction

Moderate gene-drug interaction

Minimal gene-drug interaction

Limited pharmacogenetic impact

- Tacrolimus 1, 16 (Prograf®)

Infectious disease

Major gene-drug interaction

Moderate gene-drug interaction

Minimal gene-drug interaction

Limited pharmacogenetic impact

- Atovaquone/Proguanil (Malarone®)
- Voriconazole (Vfend®)

- Nelfinavir (Viracept®)
- Peginterferon alfa-2a-containing regimens (Pegasys®)
- Peginterferon alfa-2b-containing regimens (Pegintron®)

- Abacavir 1, 2, 43, 115, 116, 120, 121, 171, 195 (Ziagen®)
- Atazanavir 45, 74 (Reyataz®)
- Clarithromycin 1, 204 (Biaxin®)
- Darunavir 1 (Prezista®)
- Delavirdine 1 (Rescriptor®)
- Efavirenz 1 (Sustiva®)
- Erythromycin 204 (E.E.S.®, Ery-Tab®)
- Fosamprenavir 1 (Lexiva®)
- Indinavir 1, 204 (Crixivan®)
- Isavuconazole 1 (Cresemba®)
- Itraconazole 1 (Onmel®, Sporanox®)
- Ivermectin 1, 232 (Stromectol®)
- Ketoconazole 1
- Maraviroc (Selzentry®)
- Mefloquine 1 (Lariam®)
- Nevirapine 1 (Viramune®)
- Quinidine 1 (Quin-G®)
- Quinine 1, 204 (Qualaquin®)
- Ritonavir 1 (Norvir®)
- Saquinavir 1, 204 (Invirase®)
- Simeprevir 1 (Olysio®)

- Atovaquone (Mepron®)
- Cefdinir (Omnicef®)
- Ceftriaxone (Rocephin®)
- Fluconazole (Diflucan®)
- Flucytosine (Ancobon®)
- Levofloxacin (Levaquin®)
- Meropenem (Merrem®)
- Moxifloxacin (Avelox®)
- Nystatin (Bio-Statin®)
- Piperacillin (Pipracil®)
- Posaconazole (Noxafil®)
- Vancomycin (Vancocin®)
- Zanamivir (Relenza®)

Infectious disease (cont.)

Major gene-drug interaction

Moderate gene-drug interaction

Minimal gene-drug interaction

Limited pharmacogenetic impact

- Telithromycin 1 (Ketek®)
- Terbinafine 1 (Lamisil®)
- Tipranavir 1 (Aptivus®)

Neurology

Major gene-drug interaction

Moderate gene-drug interaction

Minimal gene-drug interaction

Limited pharmacogenetic impact

- Brivaracetam (Briivact®)
- Carbamazepine 5, 6, 29, 30, 62, 105, 117, 125, 126, 138, 149, 153, 157, 178, 230 (Carbatrol®, Tegretol®)
- Clobazam (Onfi®)
- Fosphenytoin 2, 6, 21, 28, 117, 139 (Cerebyx®)
- Phenytoin 1, 2, 6, 21, 28, 117, 139 (Dilantin®)

- Caffeine 1 (No Doz®, Vyarin®)
- Eslicarbazepine 6, 81, 153 (Aptiom®)
- Frovatriptan (Frova®)
- Lamotrigine 6, 117, 153 (Lamictal®)
- Oxcarbazepine 6, 153 (Trileptal®)
- Rasagiline (Azilect®)
- Selegiline 8, 80, 173 (Eldepryl®, Emsam®)

- Dextromethorphan/Quinidine 1 (Nuedexta®)
- Donepezil 1 (Aricept®)
- Eletriptan 1 (Relpax®)
- Ethosuximide 10, 150 (Zarontin®)
- Tetrabenazine 1 (Xenazine®)
- Zonisamide 1 (Zonegran®)

- Gabapentin (Neurontin®)
- Levetiracetam (Keppra®)
- Memantine (Namenda®)
- Pramipexole (Mirapex®)
- Pregabalin (Lyrica®)
- Succimer (Chemet®)
- Vigabatrin (Sabril®)

Psychiatry

Major gene-drug interaction

Moderate gene-drug interaction

Minimal gene-drug interaction

Limited pharmacogenetic impact

- Amitriptyline 1, 2, 56, 57, 218 (Elavil®)
- Citalopram 1, 2, 7, 18, 41, 55, 59, 60, 61, 66, 85, 86, 101, 104, 107, 119, 124, 128, 136, 146, 152, 155, 222 (Celexa®)
- Clomipramine 1, 2, 57 (Anafranil®)
- Diazepam 68 (Valium®)
- Doxepin 1, 2, 57 (Silenor®)
- Escitalopram 1, 2, 7, 18, 41, 55, 60, 61, 66, 101, 107, 119, 128, 136, 155, 222 (Lexapro®)
- Imipramine 1, 2, 57, 215 (Tofranil®)

- Asenapine 1 (Saphris®)
- Clozapine 8, 12, 194 (Clozaril®)
- Duloxetine (Cymbalta®)
- Nicotine 3, 37, 77, 130 (Nicoderm C-Q®, Nicorette®, Nicotrol®)
- Olanzapine 2, 103, 114 (Zydis®, Zyprexa®)
- Selegiline 8, 80, 173 (Eldepryl®, Emsam®)
- Sertraline 1, 2, 40, 42, 55, 111, 132, 135, 140, 163, 169, 206, 214 (Zoloft®)

- Alprazolam 1, 204 (Xanax®)
- Amphetamine/Dextroamphetamine mixed salts 1, 52, 65, 123 (Adderall®)
- Aripiprazole 1, 2 (Abilify®)
- Atomoxetine 1, 2 (Strattera®)
- Brexpiprazole 1 (Rexulti®)
- Bupropion (Wellbutrin®)
- Buspirone 1, 204, 237 (Buspar®)
- Cariprazine 1, 3, 19, 31, 133 (Vrayvec®)

- Desvenlafaxine (Pristiq®)
- Lithium (Lithobid®)
- Milnacipran (Savella®)
- Paliperidone (Invega®)
- Varenicline (Chantix®)

## Psychiatry (cont.)

## Major gene-drug interaction

- Risperidone  2, 64, 224  
(Risperdal®)
- Trimipramine   1, 2, 57, 94  
(Surmontil®)

## Moderate gene-drug interaction

## Minimal gene-drug interaction

## Limited pharmacogenetic impact

- Chlorpromazine 1, 148, 190  
(Thorazine®)
- Desipramine 1, 2, 57  
(Norpramin®)
- Dextroamphetamine 1, 52, 65, 123  
(Dexedrine®)
- Flibanserin 1  
(Addyi®)
- Fluoxetine 1, 50, 66, 72, 111, 118, 151, 162, 188, 227  
(Prozac®, Sarafem®)
- Fluvoxamine 1, 55, 71, 82, 83, 179, 180, 186, 187, 188, 196, 231  
(Luvox®)
- Guanfacine 1, 122  
(Intuniv®, Tenex®)
- Haloperidol 1, 2, 147, 181, 209  
(Haldol®)
- Iloperidone 1  
(Fanapt®)
- Levomilnacipran 1  
(Fetzima®)
- Lisdexamfetamine 1, 52, 65, 123  
(Vyvanse®)
- Lurasidone 1  
(Latuda®)
- Mirtazapine 1, 2, 93, 112, 191, 200  
(Remeron®)
- Nefazodone 1, 168, 212  
(Serzone®)
- Nortriptyline 1, 2, 57, 144, 210  
(Pamelor®)
- Paroxetine 1, 2, 55, 70, 84, 131, 156, 170, 188, 202, 226  
(Paxil®)
- Perphenazine 1, 143  
(Etrafon®)
- Pimozide 1, 209  
(Orap®)
- Protriptyline 1  
(Vivactil®)
- Quetiapine 1, 11, 91, 204, 208  
(Seroquel®)
- Thioridazine 1
- Trazodone 1  
(Desyrel®)
- Venlafaxine 1, 2, 213  
(Effexor®)

## Psychiatry (cont.)

Major gene-drug interaction

Moderate gene-drug interaction

Minimal gene-drug interaction

Limited pharmacogenetic impact

- Vilazodone 1, 17  
(Viibryd®)
- Vortioxetine 1  
(Trintellix®)

## Rheumatology

Major gene-drug interaction

Moderate gene-drug interaction

Minimal gene-drug interaction

Limited pharmacogenetic impact

- Lesinurad + 1  
(Zurampic®)

- Allopurinol 39, 54, 63, 88, 172  
(Aloprim®, Zyloprim®)
- Cevimeline 1  
(Evoxac®)
- Colchicine 1  
(Colcrys®)
- Methotrexate 1, 158, 160, 203, 233  
(Rheumatrex®)
- Tofacitinib 1  
(Xeljanz®)

- Belimumab  
(Benlysta®)

## Sleep medicine

Major gene-drug interaction

Moderate gene-drug interaction

Minimal gene-drug interaction

Limited pharmacogenetic impact

- Ramelteon - 1  
(Rozerem®)

- Armodafinil 1  
(Nuvigil®)
- Eszopiclone 1  
(Lunesta®)
- Modafinil 1  
(Provigil®)
- Triazolam 1, 204  
(Halcion®)
- Zolpidem 1, 13, 212  
(Ambien®)

- Temazepam  
(Restoril®)

## Urology

Major gene-drug interaction

Moderate gene-drug interaction

Minimal gene-drug interaction

Limited pharmacogenetic impact

- Darifenacin 36, 87  
(Enablex®)
- Fesoterodine 1  
(Toviaz®)
- Finasteride 1  
(Propecia®, Proscar®)

- Oxybutynin 1  
(Ditropan®,  
Oxytrol®)

## Urology (cont.)

 Major gene-drug interaction Moderate gene-drug interaction Minimal gene-drug interaction Limited pharmacogenetic impact

- Sildenafil 1  
(Revatio®,  
Viagra®)
- Tadalafil 1  
(Adcirca®,  
Cialis®)
- Tamsulosin 1  
(Flomax®  
)
- Tolterodine 1  
(Detrol®)
- Vardenafil 1  
(Levitra®  
)

Genotype-derived classification of medications is provided as a service by OneOme and is intended solely for use by a medical professional who has reviewed and understands all sections within this report, including possible limitations of the services provided by OneOme. The relationships between the drugs and pharmacogenes annotated in this report are supported by scientific evidence that meets OneOme's criteria for inclusion. The order in which drugs are listed does not have any clinical or medical implications. Commonly used trade names for medications are listed for reference only. The list may not be inclusive of all trade names available and does not indicate preference or recommendation by OneOme of one medication product over another. For more information on these medications, for a list of additional medications curated but not annotated by OneOme, or to evaluate possible drug-to-drug interactions, please consult the RightMed Advisor, which is accessible through the provider portal at [oneome.com](http://oneome.com).

## Gene and phenotype summary

| Gene               | Genotype      |  | Phenotype summary / Metabolic status                                                                                                                                                                                                                                       |
|--------------------|---------------|--|----------------------------------------------------------------------------------------------------------------------------------------------------------------------------------------------------------------------------------------------------------------------------|
| CYP1A2<br>*1A/*1F  |               |  | <b>Rapid</b><br>Increased activity. Drugs converted to active metabolite(s) may cause side effects or toxicity. Active drugs converted to inactive metabolite(s) may lack efficacy.                                                                                        |
| CYP2B6<br>*1/*5    |               |  | <b>Intermediate to Normal</b><br>Decreased activity. Drugs converted to active metabolite(s) may have reduced efficacy. Active drugs converted to inactive metabolite(s) may cause side effects or toxicity.                                                               |
| CYP2C9<br>*1/*3    |               |  | <b>Intermediate</b><br>Decreased activity. Drugs converted to active metabolite(s) may have reduced efficacy. Active drugs converted to inactive metabolite(s) may cause side effects or toxicity.                                                                         |
| CYP2C19<br>*17/*17 |               |  | <b>Ultrarapid</b><br>Increased activity. Drugs converted to active metabolite(s) may cause side effects or toxicity. Active drugs converted to inactive metabolite(s) may lack efficacy.                                                                                   |
| CYP2C Cluster      | rs12777823 GG |  | <b>Normal</b><br>Normal warfarin clearance associated with CYP2C rs12777823, independent of CYP2C9*2 and *3. CYP2C rs12777823, together with CYP4F2, CYP2C9, and VKORC1, influences response to warfarin therapy.                                                          |
| CYP2D6<br>*1/*1    |               |  | <b>Normal</b><br>Normal level of activity. Drugs metabolized at a normal rate.                                                                                                                                                                                             |
| CYP3A4<br>*1/*1    |               |  | <b>Normal</b><br>Normal level of activity. Drugs metabolized at a normal rate.                                                                                                                                                                                             |
| CYP3A5<br>*3/*3    |               |  | <b>Poor</b><br>Normal dosing may be required because original dosing guidelines for drugs have been established on patients with poor metabolizer phenotype.                                                                                                               |
| CYP4F2<br>*1/*1    |               |  | <b>Normal activity</b><br>Normal activity of the CYP4F2 enzyme, which catalyzes the metabolism of vitamin K, in counterpoint to the activity of VKORC1. CYP4F2, together with CYP2C9, VKORC1, and a variant in CYP2C Cluster, influences response to warfarin therapy.     |
| COMT               | rs4680 GG     |  | <b>High activity</b><br>COMT activity with GG (Val/Val) genotype is predicted to be higher than with AA (Met/Met) or GA (Val/Met) genotypes at rs4680.                                                                                                                     |
| DPYD<br>*1/*1      |               |  | <b>Normal risk</b><br>Normal metabolizer with a dihydropyrimidine dehydrogenase (DPD) activity score of 2. Fully functional DPD enzyme activity. Normal risk of toxicities related to the administration of fluoropyrimidines (5-fluorouracil, capecitabine, and tegafur). |

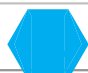

DRD2

rs1799978 GG



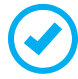

## Reduced response

Genotype is associated with a lower likelihood of improvement in schizophrenia symptoms with risperidone compared to the AA or AG genotypes.

Other clinical and/or genetic factors may influence response.

---

Gene and phenotype summary (cont.)

|             |                |                                                                                     |                                                                                                                                                                                                                                                                                                                                                                                                                                                                                                                                                                                                                                                                                                                                                                                       |
|-------------|----------------|-------------------------------------------------------------------------------------|---------------------------------------------------------------------------------------------------------------------------------------------------------------------------------------------------------------------------------------------------------------------------------------------------------------------------------------------------------------------------------------------------------------------------------------------------------------------------------------------------------------------------------------------------------------------------------------------------------------------------------------------------------------------------------------------------------------------------------------------------------------------------------------|
| F2          | rs1799963 GG   |    | <p><b>Normal risk</b></p> <p>Normal risk of thrombosis associated with Factor II (prothrombin). Other genetic and clinical factors contribute to the risk for thrombosis.</p>                                                                                                                                                                                                                                                                                                                                                                                                                                                                                                                                                                                                         |
| F5          | rs6025 GG      |    | <p><b>Normal risk</b></p> <p>Normal risk of thrombosis associated with Factor V. Other genetic and clinical factors contribute to the risk for thrombosis.</p>                                                                                                                                                                                                                                                                                                                                                                                                                                                                                                                                                                                                                        |
| GRIK4       | rs1954787 CC   |    | <p><b>Normal response</b></p> <p>Genotype predicts a normal response to citalopram in patients with major depressive disorder related to the GRIK4 genotype alone. Other clinical and genetic factors may influence response.</p>                                                                                                                                                                                                                                                                                                                                                                                                                                                                                                                                                     |
| HLA-A*31:01 | Positive for   |    | <p><b>Increased risk</b></p> <p>Increased risk of carbamazepine-induced hypersensitivity associated with the HLA- A*31:01 allele. Cross-reactivity with oxcarbazepine, eslicarbazepine, phenytoin, fosphenytoin, and lamotrigine cannot be excluded. Hypersensitivity and severe cutaneous reactions may occur regardless of the presence of the HLA-A*31:01 allele, in particular the presence of the HLA-B*15:02 allele has been associated with severe cutaneous reactions induced by certain antiepileptic agents.</p>                                                                                                                                                                                                                                                            |
| HLA-B       | Negative       |   | <p><b>Normal risk</b></p> <p>Negative for the presence of the HLA-B*15:02, HLA-B*57:01, and HLA-B*58:01 alleles. Normal risk of severe cutaneous reactions induced by carbamazepine, oxcarbazepine, eslicarbazepine, phenytoin, fosphenytoin, lamotrigine, and allopurinol. Normal risk of abacavir-induced hypersensitivity reaction. No increased risk of pazopanib-induced severe hepatotoxicity related to HLA-B*57:01 genotype. Hypersensitivity, severe cutaneous reactions, and severe hepatotoxicity may occur regardless of the presence of HLA-B*15:02, HLA-B*57:01, or HLA-B*58:01 alleles, in particular the presence of the HLA-A*31:01 allele has been associated with hypersensitivity reactions induced by carbamazepine and possibly other antiepileptic agents.</p> |
| HTR2A       | rs7997012 AA   |  | <p><b>Intron 2 genotype AA</b></p> <p>Genotype predicts an increased likelihood of response to citalopram related to the HTR2A genotype alone. Other clinical and genetic factors may influence response.</p>                                                                                                                                                                                                                                                                                                                                                                                                                                                                                                                                                                         |
| HTR2C       | rs3813929 CC   |  | <p><b>Normal risk</b></p> <p>Genotype predicts a normal risk of weight gain with clozapine or olanzapine treatment. Other clinical and/or genetic factors may influence response. The HTR2C gene is located on the X chromosome. In patients with only one X, result should read rs3813929 C:-.</p>                                                                                                                                                                                                                                                                                                                                                                                                                                                                                   |
| IFNL4       | rs12979860 CT  |  | <p><b>Reduced response</b></p> <p>Genotype predicts a reduced likelihood of sustained virologic response (SVR) with peginterferon-containing regimens.</p>                                                                                                                                                                                                                                                                                                                                                                                                                                                                                                                                                                                                                            |
| NUDT15      | rs116855232 CC |  | <p><b>Normal risk</b></p> <p>No increased risk of severe toxicities with thiopurine administration related to the NUDT15 genotype. Toxicities with thiopurines can also occur due to impaired TPMT activity, regardless of the NUDT15 status.</p>                                                                                                                                                                                                                                                                                                                                                                                                                                                                                                                                     |

## Gene and phenotype summary (cont.)

|                    |              |                                                                                     |                                                                                                                                                                                                                                                                                                                                                                                                                                                                                                                           |
|--------------------|--------------|-------------------------------------------------------------------------------------|---------------------------------------------------------------------------------------------------------------------------------------------------------------------------------------------------------------------------------------------------------------------------------------------------------------------------------------------------------------------------------------------------------------------------------------------------------------------------------------------------------------------------|
| OPRM1<br>GG        | rs1799971    |    | <b>Asp/Asp isoform</b><br>OPRM1 Asp/Asp (GG) genotype associated with decreased sensitivity to the analgesic effects of alfentanil, codeine, fentanyl, morphine, and tramadol compared to patients with the OPRM1 Asn/Asn (AA) and Asn/Asp (AG) genotypes at rs1799971. A class effect association of opioids and OPRM1 genotype has been suggested, however evidence for other opioids is limited. Additional studies are required for specific drug-gene pairs to confirm an association.                               |
| SLC6A4<br>(La/La)  | L/L          |    | <b>Typical to increased expression</b><br>Genotype predicts a typical to increased expression of the SLC6A4 transporter compared to patients with other genotypes. The L/L genotype has been associated with increased likelihood and potentially quicker response to the SSRIs fluoxetine, fluvoxamine, and possibly citalopram and escitalopram. The opposite trend in response has been observed in East Asian populations, showing increased likelihood and potentially quicker response in carriers of the S allele. |
| SLCO1B1<br>*1A/*1A |              |    | <b>Normal risk</b><br>Normal function of SLCO1B1. Normal risk of simvastatin-induced myopathy. Likelihood of normal response with pravastatin. Normal risk of methotrexate-induced toxicities when used at high dose.                                                                                                                                                                                                                                                                                                     |
| TPMT<br>*1/*4      |              |    | <b>Increased risk</b><br>Intermediate TPMT metabolizer. Increased risk of myelotoxicity with azathioprine, mercaptopurine, and thioguanine. Toxicities with thiopurines can also occur due to impaired NUDT15 activity independently of the TPMT status.                                                                                                                                                                                                                                                                  |
| UGT1A1<br>*1/*1    |              |  | <b>Normal risk</b><br>Normal metabolizer with fully functional UGT1A1 enzyme activity. No increased risk for severe neutropenia while taking irinotecan or for toxicity and/or hyperbilirubinemia while taking atazanavir, nilotinib, pazopanib or belinostat. Consult drug labeling for dosing recommendations.                                                                                                                                                                                                          |
| VKORC1             | rs9923231 GG |  | <b>Normal activity</b><br>Normal activity of the vitamin K epoxide reductase enzyme, associated with c.-1639GG (rs9923231). VKORC1, together with CYP2C9, CYP4F2, and a variant in CYP2C Cluster, influences response to warfarin therapy.                                                                                                                                                                                                                                                                                |

## CYP phenotype abbreviations

|    |                          |
|----|--------------------------|
| PM | Poor metabolizer         |
| IM | Intermediate metabolizer |
| NM | Normal metabolizer       |
| RM | Rapid metabolizer        |
| UM | Ultrarapid metabolizer   |

## Test information

Specimen ID: BU2019010000  
 Specimen type: Buccal swab  
 Collection date: 2019-01-12  
 Receive date: 2019-01-14

Clinical Testing Performed By:  
 OneOme  
 807 Broadway St. NE Suite 100  
 Minneapolis, MN 55413

Lab director: Bronwyn R. Hartung, PhD  
 CLIA: 24D2109855  
 CAP: 9432670  
 NY PFI: 9226

## Test results

The following analytical results were interpreted by OneOme to produce the pharmacogenomic interpretations and annotations described in the Gene and phenotype summary. Method-specific analytical limitations or inferred haplotypes may limit the ability to produce a definitive phenotype interpretation. See Methodology and limitations and/or the Report and laboratory comments sections for additional information.

### CYP1A2 \*1A/\*1F

|               |                          |    |
|---------------|--------------------------|----|
| rs2069514     | NG_008431.2:g.28338G>A   | GG |
| rs2069526     | NM_000761.4:c.-10+103T>G | TT |
| rs12720461    | NM_000761.4:c.-10+113C>T |    |
| CC rs35694136 | NM_000761.4:c.-1635delT  |    |
| TT rs762551   | NM_000761.4:c.-9-154C>A  |    |
| CA            |                          |    |

|             |                                     |                     |
|-------------|-------------------------------------|---------------------|
| rs765776661 | NM_000106.5:c.1411_1412insTGCCCACTG | GTGCCACGTGCCCACTG   |
| rs1135840   | NM_000106.5:c.1457G>C               | GG                  |
| rs201377835 | NM_000106.5:c.181-1G>C              | GG                  |
| rs769258    | NM_000106.5:c.31G>A                 | GG                  |
| rs28371706  | NM_000106.5:c.320C>T                | CC                  |
| rs5030655   | NM_000106.5:c.454delT               | TT rs5030865        |
|             | NM_000106.5:c.505G>[A,T]            | GG rs3892097        |
|             | NM_000106.5:c.506-1G>A              | GG rs72549354       |
|             | NM_000106.5:c.632_633insG           | -- rs72549353       |
|             | NM_000106.5:c.765_768delAACT        | AACTAACT rs35742686 |
|             | NM_000106.5:c.775delA               | AA rs5030656        |
|             | NM_000106.5:c.841_843delAAG         | AAGAAG rs16947      |
|             | NM_000106.5:c.886C>T                | CC rs5030867        |
|             | NM_000106.5:c.971A>C                | AA rs79292917       |
|             | NM_000106.5:c.975G>A                | GG rs28371725       |
|             | NM_000106.5:c.985+39G>A             | GG                  |

### CYP2B6 \*1/\*5

|            |                       |    |
|------------|-----------------------|----|
| rs3211371  | NM_000767.4:c.1459C>T | CT |
| rs3745274  | NM_000767.4:c.516G>T  | GG |
| rs2279343  | NM_000767.4:c.785A>G  | AA |
| rs28399499 | NM_000767.4:c.983T>C  | TT |

### CYP3A4 \*1/\*1

|            |                          |    |
|------------|--------------------------|----|
| rs2740574  | NM_017460.5:c.-392G>A    | AA |
| rs35599367 | NM_017460.5:c.522-191C>T | CC |

### CYP2C9 \*1/\*3

|            |                       |    |
|------------|-----------------------|----|
| rs28371685 | NM_000771.3:c.1003C>T | CC |
| rs1057910  | NM_000771.3:c.1075A>C | AC |
| rs56165452 | NM_000771.3:c.1076T>C | TT |
| rs28371686 | NM_000771.3:c.1080C>G | CC |
| rs72558193 | NM_000771.3:c.1190A>C | AA |
| rs1057911  | NM_000771.3:c.1425A>T | AT |
| rs1799853  | NM_000771.3:c.430C>T  | CC |
| rs7900194  | NM_000771.3:c.449G>A  | GG |
| rs9332131  | NM_000771.3:c.817delA | AA |

### CYP3A5 \*3/\*3

|            |                             |    |
|------------|-----------------------------|----|
| rs41303343 | NM_000777.4:c.1035_1036insT | -- |
| rs776746   | NM_000777.4:c.219-237G>A    | GG |
| rs10264272 | NM_000777.4:c.624G>A        | GG |

### CYP2C19

\*17/\*17

|            |                       |    |
|------------|-----------------------|----|
| rs12248560 | NM_000769.2:c.-806C>T | TT |
| rs28399504 | NM_000769.2:c.1A>G    | AA |
| rs4986893  | NM_000769.2:c.636G>A  | GG |
| rs6413438  | NM_000769.2:c.680C>T  | CC |
| rs4244285  | NM_000769.2:c.681G>A  | GG |

### CYP4F2 \*1/\*1

|           |                       |    |
|-----------|-----------------------|----|
| rs2108622 | NM_001082.4:c.1297G>A | GG |
|-----------|-----------------------|----|

### COMT rs4680 GG

|        |                      |    |
|--------|----------------------|----|
| rs4680 | NM_000754.3:c.472G>A | GG |
|--------|----------------------|----|

### CYP2C Cluster rs12777823 GG

|            |                            |    |
|------------|----------------------------|----|
| rs12777823 | NC_000010.10:g.96405502G>A | GG |
|------------|----------------------------|----|

### CYP2D6 \*1/\*1

|            |                              |    |
|------------|------------------------------|----|
| rs1080985  | NM_000106.5:c.-1584C>G       | CC |
| rs1065852  | NM_000106.5:c.100C>T         | CC |
| rs59421388 | NM_000106.5:c.1012G>A        | GG |
| rs72549346 | NM_000106.5:c.1088_1089insGT | -- |
| rs5030862  | NM_000106.5:c.124G>A         | GG |

### DPYD \*1/\*1

|             |                           |                |
|-------------|---------------------------|----------------|
| rs55886062  | NM_000110.3:c.1679T>G     | TT             |
| rs3918290   | NM_000110.3:c.1905+1G>A   | GG             |
| rs6736798   | NM_000110.3:c.2846A>T     | TT             |
| rs267608319 | NM_000106.5:c.1319G>A     | GG rs774671100 |
|             | NM_000106.5:c.137_138insT | --             |

DRD2 rs1799978 GG

rs1799978

NM\_000795.3:c.-585A>G

GG

---

Test results (cont.)

**F2** rs1799963 GG

|           |                      |    |
|-----------|----------------------|----|
| rs1799963 | NM_000506.4:c.*97G>A | GG |
|-----------|----------------------|----|

**F5** rs6025 GG

|        |                       |    |
|--------|-----------------------|----|
| rs6025 | NM_000130.4:c.1601G>A | GG |
|--------|-----------------------|----|

**GRIK4** rs1954787 CC

|           |                              |    |
|-----------|------------------------------|----|
| rs1954787 | NM_001282470.2:c.83-10039T>C | CC |
|-----------|------------------------------|----|

**HLA-A** Positive for \*31:01

|          |                                    |          |
|----------|------------------------------------|----------|
| HLA00097 | NM_002116 (interrogated at exon 2) | Positive |
|----------|------------------------------------|----------|

**HLA-B** Negative

|             |                                                 |          |
|-------------|-------------------------------------------------|----------|
| HLA00386    | NM_005514 (interrogated at exon 2 and intron 2) | Negative |
| HLA00381    | NM_005514 (interrogated at exon 3)              | Negative |
| rs144012689 | NM_005514.7:c.1012+104A>T                       | AA       |

**HTR2A** rs7997012 AA

|           |                           |    |
|-----------|---------------------------|----|
| rs7997012 | NM_000621.4:c.614-2211T>C | TT |
|-----------|---------------------------|----|

**HTR2C** rs3813929 CC

|           |                       |    |
|-----------|-----------------------|----|
| rs3813929 | NM_000868.3:c.-759C>T | CC |
|-----------|-----------------------|----|

**IFNL4** rs12979860 CT

|            |                             |    |
|------------|-----------------------------|----|
| rs12979860 | NM_001276254.2:c.151-152G>A | CT |
|------------|-----------------------------|----|

**NUDT15** rs116855232 CC

|             |                      |    |
|-------------|----------------------|----|
| rs116855232 | NM_018283.3:c.415C>T | CC |
|-------------|----------------------|----|

**OPRM1** rs1799971 GG

|           |                      |    |
|-----------|----------------------|----|
| rs1799971 | NM_000914.4:c.118A>G | GG |
|-----------|----------------------|----|

**SLC6A4** L/L (La/La)

|             |                                |    |
|-------------|--------------------------------|----|
| rs774676466 | NM_001045.5:c.-1917_-1875del43 | LL |
| rs25531     | NM_001045.5:c.-1936A>G         | AA |

**SLCO1B1** \*1A/\*1A

|           |                       |    |
|-----------|-----------------------|----|
| rs4149015 | NM_006446.4:c.-910G>A | GG |
| rs2306283 | NM_006446.4:c.388A>G  | GG |
| rs4149056 | NM_006446.4:c.521T>C  | TT |

**TPMT**

\*1/\*4

|           |                        |    |
|-----------|------------------------|----|
| rs1800462 | NM_000367.3:c.238G>C   | GG |
| rs1800460 | NM_000367.3:c.460G>A   | GG |
| rs1800584 | NM_000367.3:c.626-1G>A | CT |
| rs1142345 | NM_000367.3:c.719A>G   | AA |

**UGT1A1**

\*1/\*1

|           |                           |    |
|-----------|---------------------------|----|
| rs4148323 | NM_001072.3:c.862-6536G>A | GG |
| rs1976391 | NM_001072.3:c.862-9697A>G | AA |

**VKORC1** rs9923231 GG

|           |                           |    |
|-----------|---------------------------|----|
| rs9923231 | NM_001311311.1:c.-1639G>A | GG |
| rs7200749 | NM_024006.5:c.358C>T      | GG |

## Methodology and limitations

Analytical results were produced using tests developed and validated by OneOme, LLC, a clinical laboratory located at 807 Broadway Street NE Suite 100, Minneapolis, MN 55413. These tests have not been cleared or approved by the U.S. Food and Drug Administration. OneOme is certified under CLIA-88 and accredited by the College of American Pathologists as qualified to perform high-complexity testing. This test is used for clinical purposes and should not be regarded as investigational or for research.

Genomic DNA was analyzed by PCR using Thermo Fisher TaqMan® and/or LGC Biosearch BHQ® probe-based methods to interrogate the variant locations listed in the Test results table above. In addition, CYP2D6 copy number status was assessed at sites within the promoter, intron 2, intron 6, and exon 9. The test detects CYP2D6 deletions, duplications/multiplications, and hybrid alleles, but cannot differentiate duplications in the presence of a deletion.

Haplotypes, or combinations of inherited variants on a chromosome, are annotated according to legacy nomenclature for the genes and alleles in the table below. Less frequent haplotypes or novel alleles may be reported when appropriate.

CYP1A2 \*1C, \*1D, \*1E, \*1F, \*1J, \*1K,

\*1L, \*1V, \*1W CYP2B6 \*4, \*5, \*6, \*7, \*9,

|          |                                                                                                                                                                                                   |
|----------|---------------------------------------------------------------------------------------------------------------------------------------------------------------------------------------------------|
| *16, *18 |                                                                                                                                                                                                   |
| CYP2C9   | *2, *3, *4, *5, *6, *8, *11                                                                                                                                                                       |
| CYP2C19  | *2, *3, *4, *4B, *10, *17                                                                                                                                                                         |
| CYP2D6   | *2A, *2, *3, *4, *4J, *4M, *4N, *5, *6, *6C, *7, *8, *9, *10, *11, *12, *13, *14A, *14B, *15, *17, *18, *19, *29, *31, *34, *35, *36, *39, *41, *42, *59, *61, *63, *64, *68, *69, *70, *91, *109 |
| CYP3A4   | *1B, *22                                                                                                                                                                                          |
| CYP3A5   | *3, *6, *7                                                                                                                                                                                        |
| CYP4F2   | *3                                                                                                                                                                                                |
| DPYD     | *2A, *13                                                                                                                                                                                          |
| SLCO1B1  | *5, *15, *17, *21                                                                                                                                                                                 |
| TPMT     | *2, *3A, *3B, *3C, *4                                                                                                                                                                             |
| UGT1A1   | *6, *28                                                                                                                                                                                           |

The test does not detect all known and unknown variations in the gene(s) tested, nor does absence of a detectable variant (designated as \*1 for genes encoding drug metabolizing enzymes) rule out the presence of other, non-detected variants.

As with other common SNP genotyping techniques, these assays cannot differentiate between the maternal and paternal chromosomes. In cases where observed variants are associated with more than one haplotype, OneOme infers and reports the most likely diplotype based on published allele frequency and/or ethnicity data. Inferences with potential clinical impact are reported in the Report and laboratory comments section.

The variant detection methods validated by OneOme provide >99.9% accuracy; however, PCR may be subject to general interference by factors such as reaction inhibitors and low quality or quantity of extracted DNA. When present, these interferences typically yield no result rather than an inaccurate one. Very infrequent variants or polymorphisms occurring in primer- or probe-binding regions may also affect testing and could produce an erroneous result or assay failure. Variant locations tested by the assay but not assigned a genotype call are reported as “No Call.” Test results and clinical interpretation may be inaccurate for individuals who have undergone or are receiving non- autologous blood transfusions, tissue, and/or organ transplant therapies. Although extremely rare, results could also be impacted by other factors not addressed above, such as laboratory error.

Due to the complexity of interpreting some genetic test results, such as those that may carry a probabilistic risk of disease, patients and providers should consider the benefits of consulting with a trained genetic counseling professional, physician, or pharmacogenomic specialist. Patients and providers are also encouraged to visit [oneome.com](http://oneome.com) to explore the tools and resources available to help understand these test results. For additional support, contact OneOme through the website or by calling 844-663-6635.

## OneOme liability disclaimer

---

The interpretations and clinical annotations provided by OneOme are intended solely for use by a medical professional and do not constitute medical advice by OneOme. The treating provider remains ultimately responsible for all diagnosis and treatment decisions for the patient. OneOme disclaims liability for any errors, omissions or ambiguities in any translation or interpretation of a report by a third party, including without limitation direct, indirect, incidental, special, consequential or exemplary damages, whether such damages arise in contract, negligence, tort, under statute, in equity, at law or otherwise. Information included in this report is based upon scientific literature and does not take into account other genetic variants and environmental or social factors that may affect a patient's response. Other factors not included in this report include, but are not limited to, environmental factors (e.g., smoking), health factors (e.g., diet), social and familial factors, various medical conditions, and drug-to-drug interactions. Administration of any medication, including the ones listed in the OneOme reports, requires careful therapeutic monitoring regardless of the phenotype or genotype-predicted interaction reported. As a matter of practice, OneOme will routinely update its pharmacogenomic database as new information becomes available to the scientific community. Genotype-predicted interactions and annotations found on the patient's RightMed comprehensive test report, RightMed Advisor reports, or RightMed specialty reports are therefore dependent on the date of generation and/or the database version used to generate that report. Providers may access these reports with updated annotations using OneOme's latest released version through the provider portal at [portal.oneome.com](http://portal.oneome.com).



## References

1. FDA. See FDA Drug Label. US Food Drug Adm. 2018. Available at: <http://www.fda.gov/ScienceResearch/BioinformaticsTools/ucm289739.htm>
2. Swen JJ, Nijenhuis M, de Boer A, et al. *Clin Pharmacol Ther.* 2011;89(5):662-73.
3. Abstracts 10th Eur Reg ISSX Mtg. *Drug Metab Rev.* 2008;40 Suppl 1:1-172. 2010;20(3):85-92.
4. Abumiya M, Takahashi N, Niioka T, et al. *Drug Metab Pharmacokinet.* 2014;29(6):449-54.
5. Al-Gahtany M, Karunakaran G, Munisamy M. *BMC Genomics.* 2014;15(Suppl 2):P2.
6. Amstutz U, Shear NH, Rieder MJ, et al. *Epilepsia.* 2014;55(4):496-506.
7. Arias B, Catalan R, Gasto C, et al. *J Clin Psychopharmacol.* 2003;23(6):563-7.
8. Arranz MJ, Collier DA, Munro J, et al. *Neurosci Lett.* 1996;217(2-3):177-8.
9. Baber M, Chaudhry S, Kelly L, et al. *Pharmacogenomics J.* 2015;15(5):430-5.
10. Bachmann K, He Y, Sarver JG, et al. *Xenobiotica.* 2003;33(3):265-76.
11. Bakken GV, Molden E, Hermann M. *Ther Drug Monit.* 2015;37(2):256-61.
12. Balibey H, Basoglu C, Lundgren S, et al. *Bulletin of Clin Psychopharm.* 2016;21(2):93-9.
13. Barkin RL. *Am J Ther.* 2007;14(3):299-305.
14. Bastami S, Gupta A, Zackrisson AL, et al. *Basic Clin Pharmacol Toxicol.* 2014;115(5):423-31.
15. Bell GC, Caudle KE, Whirl-Carrillo M, et al. *Clin Pharmacol Ther.* 2016. DOI: 10.1002/cpt.598
16. Birdwell KA, Decker B, Barbarino JM, et al. *Clin Pharmacol Ther.* 2015;98(1):19-24.
17. Boinpally R, Gad N, Gupta S, et al. *Clin Ther.* 2014;36(11):1638-49.
18. Bousman C, Sarris J, Won E, et al. *J Clin Psychopharmacol.* 2014;34(5):645-8.
19. Caccia S, Invernizzi RW, Nobili A, et al. *Ther Clin Risk Manag.* 2013;9:319-28.
20. Campa D, Gioia A, Tomei A, et al. *Clin Pharmacol Ther.* 2008;83(4):559-66.
21. Caudle KE, Rettie AE, Whirl-Carrillo M, et al. *Clin Pharmacol Ther.* 2014;96(5):542-8.
22. Caudle KE, Thorn CF, Klein TE, et al. *Clin Pharmacol Ther.* 2013;94(6):640-5.
23. Cavallari LH, Langaee TY, Momary KM, et al. *Clin Pharmacol Ther.* 2010;87(4):459-64.
24. Chan SW, Hu M, Ko SSW, et al. *Eur J Clin Pharmacol.* 2013;69:799-806.
25. Chidambaran V, Mavi J, Esslinger H, et al. *Pharmacogenomics J.* 2015;15(3):255-62.
26. Chou WY, Yang LC, Lu HF, et al. *Acta Anaesthesiol Scand.* 2006;50(7):787-92.
27. Chugh R, Wagner T, Griffith KA, et al. *Cancer.* 2007;109(11):2315-22.
28. Chung WH, Chang WC, Lee YS, et al. *JAMA.* 2014;312(5):525-34.
29. Chung WH, Hung SI, Chen YT. *Curr Opin Allergy Clin Immunol.* 2007;7(4):317-23.
30. Chung WH, Hung SI, Hong HS, et al. *Nature.* 2004;428(6982):486.
31. Citrome L. *Adv Ther.* 2013;30(2):114-26.
32. Clement B, Demesmaeker M. *Drug Metab Dispos.* 1997;25(11):1266-71.
33. Colilla S, Lerman C, Shields P, et al. *Pharmacogenet Genomics.* 2005;15(6):393-8.
34. Crews KR, Gaedigk A, Dunnenberger HM, et al. *Clin Pharmacol Ther.* 2012;91(2):321-6.
35. Crews KR, Gaedigk A, Dunnenberger HM, et al. *Clin Pharmacol Ther.* 2014;95(4):376-82.
36. Croom KF, Keating GM. *Drug Aging.* 2004;21(13):885-92.
37. David SP, Johnstone EC, Churchman M, et al. *Nicotine Tobacco Res.* 2011;13(3):157-67.
38. De Martin S, Orlando R, Bertoli M, et al. *Clin Pharmacol Ther.* 2006;80(6):597-606.
39. Dean L. *Med Genet Summ.* Bethesda: NCBI, 2017. Available at: <https://www.ncbi.nlm.nih.gov/books/NBK100662/>
40. Dogan O, Yuksel N, Ergun M, et al. *Genet Test.* 2008;12(2):225-31.
41. Dreimüller N, Tadić A, Dragicevic A, et al. *Pharmacopsychiatry.* 2011;45(03):108-13.
42. Durham L, Webb S, Milos P, et al. *Psychopharmacology.* 2003;174(4):525-9.
43. Faruki H, Heine U, Brown T, et al. *Pharmacogenet Genomics.* 2007;17(10):857-60.
44. Fukuda K, Hayashida M, Ide S, et al. *Pain.* 2009;147(1-3):194-201.
45. Gudayol-Ferré E, Herrera-Guzmán I, Camarena B, et al. *J Affect Disord.* 2010;127(1-3):343-51.
46. Guilemette C. *Pharmacogenomics J.* 2003;3(3):136-58.
47. Hamidovic A, Dlugos A, Palmer AA, et al. *Psychiatr Genet.* 2008;9(11):1605-16.
48. Hershfield MS, Callaghan JT, Tassaneeyakul W, et al. *Clin Pharmacol Ther.* 2013;93(2):153-8.
49. Hicks JK, Bishop JR, Sangkuhl K, et al. *Clin Pharmacol Ther.* 2015;98(2):127-34.
50. Hicks JK, Sangkuhl K, Swen JJ, et al. *Clin Pharmacol Ther.* 2017;102(1):37-44.
51. Hicks JK, Swen JJ, Thorn CF, et al. *Clin Pharmacol Ther.* 2013;93(5):402-8.
52. Hidestrand M, Oscarson M, Salonen JS, et al. *Drug Metab Dispos.* 2001;29(11):1480-4.
53. Horstmann S, Lucae S, Menke A, et al. *Neuropsychopharmacol.* 2010;35:727-40.
54. Hu X, Rush A, Charney D, et al. *Arch Gen Psychiatry.* 2007;64(7):783.
55. Huez-Diaz P, Uher R, Smith R, et al. *Br J Psych.* 2009;195(1):30-8.
56. Hung SI, Chung WH, Jee SH, et al. *Pharmacogenet Genomics.* 2006;16(4):297-306.
57. Hung SI, Chung WH, Liou LB, et al. *PNAS.* 2005;102(11):4134-4139.
58. Ikeda M, Yamanoouchi Y, Kinoshita Y, et al. *Pharmacogenomics.* 2008;9(10):1437-43.
59. Ilieva I, Boland J, Farah MJ. *Neuropharmacology.* 2013;64:496-505.
60. Illi A, Poutanen O, Setälä-Soikkeli E, et al. *Eur Arch Psychiatry Clin Neurosci.* 2010;261(2):95-102.
61. Innocenti F, Grimsley C, Das S, et al. *Pharmacogenetics.* 2002;12(9):725-33.
62. Inomata S, Nagashima A, Itagaki F, et al. *Clin Pharmacol Ther.* 2005;78(6):647-55.
63. Ishida T, Naito T, Sato H, et al. *Drug Metab Pharmacokinet.* 2016;31(3):242-8.
64. Ishiguro S, Watanabe T, Ueda M, et al. *Eur J Clin Pharmacol.* 2011;67(12):1213-21.
65. Ito K, Yoshida K, Sato K, et al. *Psychiatry Res.* 2002;111(2-3):235-9.
66. Ivanets N, Kinkulkina M, Tikhonova Y, et al. *Zu Nevrol Psikhiatr Im S S Korsakova.* 2017;47(4):386-92.
67. Jackman DM, Kindler HL, Yeap BY, et al. *Cancer.* 2008;113(4):808-14.
68. Johnson DH, Venuto C, Ritchie MD, et al. *Pharmacogenet Genomics.* 2014;24(4):195-203.
69. Johnson JA, Caudle KE, Gong L, et al. *Clin Pharmacol Ther.* 2017;102(3):397-404.
70. Johnson JA, Gong L, Whirl-Carrillo M, et al. *Clin Pharmacol Ther.* 2011;90(4):625-9.
71. Johnstone E, Elliot K, David S, et al. *Cancer Epidemiol Biomarkers Prev.* 2007;16(6):1065-9.
72. Kagen M, Dain J, Peng L, et al. *Drug Metab Dispos.* 2012;40(9):1712-22.
73. Kaiser R, Sezer O, Papies A, et al. *J Clin Oncol.* 2002;20(12):2805-11.
74. Kamada T, Chow T, Hiroi T, et al. *Drug Metab Pharmacokinet.* 2002;17(3):199-206.
75. Kaniwa N, Saito Y. *Ther Adv Drug Saf.* 2013;4(6):246-53.
76. Kato M, Fukuda T, Wakeno M, et al. *Neuropsychobiology.* 2006;53(4):186-95.
77. Kato M, Ikenaga Y, Wakeno M, et al. *Int Clin Psychopharmacol.* 2005;20(3):151-6.
78. Kato M, Nonen S, Serretti A, et al. *J Clin Psychopharmacol.* 2012;11:473-500.
79. Kato M, Serretti A. *Mol Psychiatry.* 2010;15:473-500.
80. Kawaguchi DM, Glatt SJ. *Pharmacogenomics.* 2014;15(11):1451-9.
81. Kerbusch T, Waehly U, Milligan PA, et al. *Br J Clin Pharmacol.* 2003;56:639-52.
82. Khanna D, FitzGerald JD, Khanna PP, et al. *Arthritis Care Res.* 2012;64(10):1431-46.
83. Kharasch ED, Walker A, Isoherranen N, et al. *Clin Pharmacol Ther.* 2007;82(4):410-26.
84. Kidd RS, Straughn AB, Meyer MC, et al. *Pharmacogenetics.* 1999;9(1):71-80.
85. Kim KA, Joo HJ, Lee HM, et al. *Pharmacogenet Genomics.* 2014;24(1):35-42.
86. Kim KM, Kim HK, Lim SH, et al. *Int J Clin Pharmacol Ther.* 2013;51(5):383-92.
87. Kirchheiner J, Henckel HB, Meineke I, et al. *J Clin Psychopharmacol.* 2004;24(6):647-52.
88. Kirchheiner J, Muller G, Meineke I, et al. *J Clin Psychopharmacol.* 2003;23(5):459-66.
89. Kirchheiner J, Roots I, Goldammer M, et al. *Clin Pharmacokinet.* 2005;44(12):1209-25.
90. Kitagawa C, Ando M, Ando Y, et al. *Pharmacogenet Genomics.* 2014;24(10):486-91.
91. Kivistö KT, Kroemer HK, Eichelbaum M. *Br J Clin Pharmacol.* 1995;40:523-30.
92. Klees TM, Sheffels P, Thummel KE, et al. *Anesthesiology.* 2008;9(11):1605-16.
93. Hayashida M, Nagashima M, Satoh Y, et al. *Pharmacogenomics.* 2008;9(11):1605-16.
94. Hershfield MS, Callaghan JT, Tassaneeyakul W, et al. *Clin Pharmacol Ther.* 2013;93(2):153-8.
95. Hicks JK, Bishop JR, Sangkuhl K, et al. *Clin Pharmacol Ther.* 2015;98(2):127-34.
96. Hicks JK, Sangkuhl K, Swen JJ, et al. *Clin Pharmacol Ther.* 2017;102(1):37-44.
97. Hicks JK, Swen JJ, Thorn CF, et al. *Clin Pharmacol Ther.* 2013;93(5):402-8.
98. Hidestrand M, Oscarson M, Salonen JS, et al. *Drug Metab Dispos.* 2001;29(11):1480-4.
99. Horstmann S, Lucae S, Menke A, et al. *Neuropsychopharmacol.* 2010;35:727-40.
100. Hu X, Rush A, Charney D, et al. *Arch Gen Psychiatry.* 2007;64(7):783.
101. Huez-Diaz P, Uher R, Smith R, et al. *Br J Psych.* 2009;195(1):30-8.
102. Hung SI, Chung WH, Jee SH, et al. *Pharmacogenet Genomics.* 2006;16(4):297-306.
103. Hung SI, Chung WH, Liou LB, et al. *PNAS.* 2005;102(11):4134-4139.
104. Ikeda M, Yamanoouchi Y, Kinoshita Y, et al. *Pharmacogenomics.* 2008;9(10):1437-43.
105. Ilieva I, Boland J, Farah MJ. *Neuropharmacology.* 2013;64:496-505.
106. Illi A, Poutanen O, Setälä-Soikkeli E, et al. *Eur Arch Psychiatry Clin Neurosci.* 2010;261(2):95-102.
107. Innocenti F, Grimsley C, Das S, et al. *Pharmacogenetics.* 2002;12(9):725-33.
108. Inomata S, Nagashima A, Itagaki F, et al. *Clin Pharmacol Ther.* 2005;78(6):647-55.
109. Ishida T, Naito T, Sato H, et al. *Drug Metab Pharmacokinet.* 2016;31(3):242-8.
110. Ishiguro S, Watanabe T, Ueda M, et al. *Eur J Clin Pharmacol.* 2011;67(12):1213-21.
111. Ito K, Yoshida K, Sato K, et al. *Psychiatry Res.* 2002;111(2-3):235-9.
112. Ivanets N, Kinkulkina M, Tikhonova Y, et al. *Zu Nevrol Psikhiatr Im S S Korsakova.* 2017;47(4):386-92.
113. Jackman DM, Kindler HL, Yeap BY, et al. *Cancer.* 2008;113(4):808-14.
114. Johnson DH, Venuto C, Ritchie MD, et al. *Pharmacogenet Genomics.* 2014;24(4):195-203.
115. Johnson JA, Caudle KE, Gong L, et al. *Clin Pharmacol Ther.* 2017;102(3):397-404.
116. Johnson JA, Gong L, Whirl-Carrillo M, et al. *Clin Pharmacol Ther.* 2011;90(4):625-9.
117. Johnstone E, Elliot K, David S, et al. *Cancer Epidemiol Biomarkers Prev.* 2007;16(6):1065-9.
118. Kagen M, Dain J, Peng L, et al. *Drug Metab Dispos.* 2012;40(9):1712-22.
119. Kaiser R, Sezer O, Papies A, et al. *J Clin Oncol.* 2002;20(12):2805-11.
120. Kamada T, Chow T, Hiroi T, et al. *Drug Metab Pharmacokinet.* 2002;17(3):199-206.
121. Kaniwa N, Saito Y. *Ther Adv Drug Saf.* 2013;4(6):246-53.
122. Kato M, Fukuda T, Wakeno M, et al. *Neuropsychobiology.* 2006;53(4):186-95.
123. Kato M, Ikenaga Y, Wakeno M, et al. *Int Clin Psychopharmacol.* 2005;20(3):151-6.
124. Kato M, Nonen S, Serretti A, et al. *J Clin Psychopharmacol.* 2012;11:473-500.
125. Kato M, Serretti A. *Mol Psychiatry.* 2010;15:473-500.
126. Kawaguchi DM, Glatt SJ. *Pharmacogenomics.* 2014;15(11):1451-9.
127. Kerbusch T, Waehly U, Milligan PA, et al. *Br J Clin Pharmacol.* 2003;56:639-52.
128. Khanna D, FitzGerald JD, Khanna PP, et al. *Arthritis Care Res.* 2012;64(10):1431-46.
129. Kharasch ED, Walker A, Isoherranen N, et al. *Clin Pharmacol Ther.* 2007;82(4):410-26.
130. Kidd RS, Straughn AB, Meyer MC, et al. *Pharmacogenetics.* 1999;9(1):71-80.
131. Kim KA, Joo HJ, Lee HM, et al. *Pharmacogenet Genomics.* 2014;24(1):35-42.
132. Kim KM, Kim HK, Lim SH, et al. *Int J Clin Pharmacol Ther.* 2013;51(5):383-92.
133. Kirchheiner J, Henckel HB, Meineke I, et al. *J Clin Psychopharmacol.* 2004;24(6):647-52.
134. Kirchheiner J, Muller G, Meineke I, et al. *J Clin Psychopharmacol.* 2003;23(5):459-66.
135. Kirchheiner J, Roots I, Goldammer M, et al. *Clin Pharmacokinet.* 2005;44(12):1209-25.
136. Kitagawa C, Ando M, Ando Y, et al. *Pharmacogenet Genomics.* 2014;24(10):486-91.

## References

- 2005;102(3):550-6.  
 100. Klepstad P, Rakvåg TT, Kaasa S, et al. *Acta Anaesthesiol Scand*. 2004;48(10):1232-9.  
 101. Kraft J, Peters E, Slager S, et al. *Biol Psychiatry*. 2007;61(6):734-42.  
 102. Kuip EJ, Zandvliet ML, Koolen SL, et al. *Br J Clin Pharmacol*. 2017;83(2):294-313.  
 103. Laika B, Leucht S, Heres S, et al. *Pharmacogenomics J*. 2010;10:20-29.  
 104. Laje G, Perlis RH, Rush AJ, et al. *Psychiatr Serv*. 2009;60(11):1446-57.  
 105. Leckband SG, Kelsoe JR, Dunnenberger HM, et al. *Clin Pharmacol Ther*. 2013;94(3):324-8.  
 106. Lee MG, Kim HJ, Lee KH, et al. *Korean J Pain*. 2016;29(1):34-9.  
 107. Lewis G, Mulligan J, Wiles N, et al. *Br J Psych*. 2011;198(6):464-71.  
 108. Li Y, Collier JK, Hutchinson MR, et al. *Drug Metab Dispos*. 2013;41(6):1264-72.  
 109. Li Y, Jackson KA, Slon B, et al. *Br J Clin Pharmacol*. 2015;80(2):276-84.  
 110. Liang JJ, Geske JR, Boilson BA, et al. *Pharmacogenet Genomics*. 2013;23(12):658-655.  
 111. Lim S, Won H, Kim H, et al. *PLoS ONE*. 2014;9(9):e107098.  
 112. Lind AB, Reis M, Bengtsson F, et al. *Clin Pharmacokinet*. 2009;48(1):63-70.  
 113. Liu YC, Wang WS. *Cancer*. 2012;118:1718-25.  
 114. Ma X, Maimaitirexiati T, Zhang R, et al. *Int J Psychiatry Clin Pract*. 2014;18(4):229-42.  
 115. Mallal S, Nolan D, Witt C, et al. *Lancet*. 2002;359(9308):727-32.  
 116. Mallal S, Phillips E, Carosi G, et al. *N Engl J Med*. 2008;358(6):568-79.  
 117. Man CB, Kwan P, Baum L, et al. *Epilepsia*. 2007;48(5):1015-18.  
 118. Manoharan A, Shewade D, Rajkumar R, et al. *Eur J Clin Pharmacol*. 2016;72(10):1215-20.  
 119. Maron E, Tammiste A, Kallassalu K, et al. *Eur Neuropsychopharmacol*. 2009;19(6):451-6.  
 120. Martin MA, Hoffman JM, Freimuth RR, et al. *Clin Pharmacol Ther*. 2014;95(5):499-500.  
 121. Martin MA, Klein TE, Dong BJ, et al. *Clin Pharmacol Ther*. 2012;91(4):734-8.  
 122. Martinez-Raga J, Knecht C, de Alvaro R. *Neuropsychiatr Dis Treat*. 2015;11:1359-70.  
 123. Mattay VS, Goldberg TE, Fera F, et al. *Proc Natl Acad Sci U S A*. 2003;100(10):6186-91.  
 124. McMahon FJ, Buervenich S, Charney D, et al. *Am J Hum Genet*. 2006;78(5):804-14.  
 125. Meng H, Ren J, Lv Y, et al. *Neurology Asia*. 2011;16(1):39-45.  
 126. Milovanovic D, Radosavljevic I, Radovanovic M, et al. *Serbian J Exper Clin Res*. 2015;16(2):93-9.  
 127. Motohashi S, Mino Y, Hori K, et al. *Bio Pharm Bull*. 2013;36(4):676-81.  
 128. Mrazek D, Rush A, Biernacka J, et al. *Am J Med Genet B Neuropsychiatr Genet*. 2009;150B(3):341-51.  
 129. Muir AJ, Gong L, Johnson SG, et al. *Clin Pharmacol Ther*. 2014;95(2):141-6.  
 130. Munafò M, Johnstone E, Guo B, et al. *Pharmacogenet Genomics*. 2008;18(2):121-8.  
 131. Murphy G, Hollander S, Rodrigues H, et al. *Arch Gen Psychiatry*. 2004;61(11):1163-9.  
 132. Mushtaq D, Ali A, Margoob M, et al. *J Affect Disord*. 2012;136(3):955-62.  
 133. Nakamura T, Kubota T, Iwakaji A, et al. *Drug Des Devel Ther*. 2016;10:327-38.  
 134. Naritomi Y, Terashita S, Kagayama A. *Xenobiotica*. 2004;34(5):415-27.  
 135. Ng C, Easteal S, Tan S, et al. *Prog Neuropsychopharmacol Biol Psychiatry*. 2006;30(5):953-7.  
 136. Ng C, Sarris J, Singh A, et al. *Hum Psychopharmacol*. 2013;28(5):516-22.  
 137. Niemi M, Neuvonen PJ, Hofmann U, et al. *Pharmacogenet Genomics*. 2005;15(5):303-9.  
 138. Niihara H, Kakamu T, Fujita Y, et al. *J Dermatol*. 2012;39(7):594-601.  
 139. Niinuma Y, Saito T, Takahashi M, et al. *Pharmacogenomics J*. 2014;14:107-14.  
 140. Obach RS, Cox LM, Tremaine LM. *Drug Metab Dispos*. 2005;33(2):262-70.  
 141. Oda Y, Hamaoka N, Hiroi T, et al. *Br J Clin Pharmacol*. 2001;51(3):281-5.  
 142. Oertel BG, Schmidt R, Schneider A, et al. *Pharmacogenet Genomics*. 2006;16(9):625-36.  
 143. Olesen OV, Linnet K. *Br J Clin Pharmacol*. 2000;50(6):563-571.  
 144. Olesen OV, Linnet K. *Drug Metab Dispos*. 1997;25(6):740-44.  
 145. Orlando R, Piccoli P, De Martin S, et al. *Clin Pharmacol Ther*. 2004;75(1):80-8.  
 146. Paddock S, Laje G, Charney D, et al. *Am J Psych*. 2007;164:1181-8.

## References (cont.)

147. Pan LP, Wijnant P, De Vriendt C, et al. *Br J Clin Pharmacol*. 1997;44(6):557-64.
148. Pantuck EJ, Pantuck CB, Anderson KK, et al. *Clin Pharmacol Ther*. 1982;31(4):533-8.
149. Park P, Seo Y, Ahn J, et al. *J Clin Pharm Ther*. 2009;34(5):569-74.
150. Patsalos PN. *Epilepsia*. 2005;46(9):140-8.
151. Perlis R, Mischoulon D, Smoller J, et al. *Biol Psychiatry*. 2003;54(9):879-83.
152. Peters EJ, Slager SL, Jenkins GD, et al. *Pharmacogenet Genomics*. 2009;19(1):1-10.
153. Phillips EJ, Sukasem C, Whirl-Carrillo M, et al. *Clin Pharmacol Ther*. 2018. DOI:10.1002/cpt.1004
154. Phimmason S, Kharasch ED. *Clin Pharmacol Ther*. 2001;70(6):505-17.
155. Poland R, Lesser I, Wan Y, et al. *Life Sci*. 2013;92(20-21):967-70.
156. Pollock BG, Ferrell RE, Mulsant BH, et al. *Neuropsychopharmacol*. 2000;23(5):587-90.
157. Puranik Y, Birnbaum A, Marino S, et al. *Pharmacogenomics*. 2013;14(1):35-45.
158. Radtke S, Zolk O, Renner B, et al. *Blood*. 2013;121(26):5145-53.
159. Ramsey LB, Johnson SG, Caudle KE, et al. *Clin Pharmacol Ther*. 2014;96(4):423-8.
160. Ramsey LB, Panetta JC, Smith C, et al. *Blood*. 2013;121(6):898-904.
161. Rao LK, Flaker AM, Friedel CC, et al. *Anesthesiology*. 2016;125(6):1103-12.
162. Rausch J, Johnson M, Fei Y, et al. *Biol Psychiatry*. 2002;51(9):723-32.
163. Reimherr F, Amsterdam J, Dunner D, et al. *Psychiatry Res*. 2010;175(1-2):67-73.
164. Relling MV, Gardner EE, Sandborn WJ, et al. *Clin Pharmacol Ther*. 2011;89(3):387-91.
165. Relling MV, Gardner EE, Sandborn WJ, et al. *Clin Pharmacol Ther*. 2013;93(4):324-5.
166. Relling MV, Nemej J, Schuetz EG, et al. *Mol Pharmacol*. 1994;45(2):352-8.
167. Reyes-Gibby CC, Shete S, Rakvåg T, et al. *Pain*. 2007;130(1-2):25-30.
168. Rotzinger S, Baker GM. *Eur Neuropsychopharmacol*. 2002;12(2):91-100.
- 2014;36(3):345-52.
169. Rudberg I, Hermann M, Refsum H, et al. *Euro J Clin Pharmacol*. 2008;64(12):1181-8.
170. Ruhé H, Ooteman W, Booi J, et al. *Pharmacogenet Genomics*. 2009;19(1):67-76.
171. Saag M, Balu R, Phillips E, et al. *Clin Infect Dis*. 2008;46(7):1111-8.
172. Saito Y, Stamp LK, Caudle KE, et al. *Clin Pharmacol Ther*. 2015;99(1):36-37.
173. Salonen JS, Nyman L, Boobis AR, et al. *Drug Metab Dispos*. 2003;31(9):1093-1102.
174. Schaid DJ, Spraggs CF, McDonnell SK, et al. *J Clin Oncol*. 2014;32(22):2296-303.
175. Scott SS, Sangkuhl K, Gardner EE, et al. *Clin Pharmacol Ther*. 2011;90(2):328-32.
176. Scott SS, Sangkuhl K, Stein CM, et al. *Clin Pharmacol Ther*. 2013;94(3):317-23.
177. SEARCH Collaborative Group, Link E, Parish S, et al. *N Engl J Med*. 2008;359(8):789-99.
178. Seo T, Nakada N, Ueda N, et al. *Clin Pharmacol Ther*. 2006;79(5):509-10.
179. Serretti A, Cusin C, Rossini D, et al. *Am J Med Genet*. 2004;129B(1):36-40.
180. Serretti A, Zanardi R, Rossini D, et al. *Mol Psychiatry*. 2001;6(5):586-92.
181. Shimoda K, Someya T, Morita S, et al. *Progress Neuropsychopharmacol*. 1999;39(6):567-77.
182. Shon JH, Yoon YR, Kim MJ, et al. *Br J Clin Pharmacol*. 2005;59(5):552-63.
183. Sia AT, Lim Y, Lim EC, et al. *Anesthesiology*. 2008;109(3):520-6.
184. Sia AT, Lim Y, Lim EC, et al. *J Pain*. 2013;14(10):1045-52.
185. Sistonon J, Madadi P, Ross CJ, et al. *Clin Pharmacol Ther*. 2012;91(4):692-9.
186. Smeraldi E, Serretti A, Artioli P, et al. *Psychiatr Genet*. 2006;16(4):153-8.
187. Smeraldi E, Zanardi R, Benedetti F, et al. *Mol Psychiatry*. 1998;3(6):508-11.
188. Smits K, Smits L, Peeters F, et al. *Psychiatr Genet*. 2008;18(4):184-90.
189. Stamer UM, Musshoff F, Stüber F, et al. *Pain*. 2016;157(11):2467-75.
190. Stimmel GL, Falloon IR. *J Clin Psychiatry*. 1983;44(11):420-22.
191. Stormer E, von Moltke LL, Greenblatt DJ. *J Pharmacol Exper Ther*. 2000;295(2):793-801.
192. Subrahmanyam V, Renwick AB, Walters DG, et al. *Drug Metab Dispos*. 2001;29(8):1146-55.
193. Subramanian M, Agrawal V, Sandee D, et al. *Pharmacogenet Genomics*. 2012;22(8):590-7.
194. Suetani RJ, Siskind D, Reichhold H, et al. *Psychopharmacology (Berl)*. 2017;234(20):2989-3008.
195. Sun HY, Hung CC, Lin PH, et al. *J Antimicrob Chemother*. 2007;60(3):599-604.
196. Takahashi H, Yoshida K, Ito K, et al. *Eur Neuropsychopharmacol*. 2002;12(5):477-81.
197. Tan EC, Lim EC, Teo YY, et al. *Mol Pain*. 2009;5:32.
198. Tanaka N, Naito T, Yagi T, et al. *Ther Drug Monit*. 2011;412(9):755-60.
199. Thorn CF, Klein TE, Altman RB. *Pharmacogenet Genomics*. 2009;19(7):556-8.
200. Timmer CJ, Ad Sitsen JM, Delbressine LP. *Clin Pharmacokinet*. 2000;38(6):461-74.
201. Tirkkonen T, Heikkilä P, Huupponen R, et al. *J Intern Med*. 2010;268(4):359-66.
202. Tomita T, Yasui-Furukori N, Nakagami T, et al. *PLoS ONE*. 2014;9(5):e98099.
203. Treviño LR, Shimasaki N, Yang W, et al. *J Clin Oncol*. 2009;27(35):5972-8.
204. Tseng E, Walsky RL, Luzietti RA, et al. *Drug Metab Dispos*. 2014;42(7):1163-73.
205. Tzvetkov MV, Saadatmand AR, Lötsch J, et al. *Clin Pharmacol Ther*. 2011;90(1):143-50.
206. Umene-Nakano W, Yoshimura R, Ueda N, et al. *J Psychopharmacol*. 2009;24(12):1764-71.
207. Van der Padt A, Van Schaik RHN, Sonneveld P. *Neth J Med*. 2006;64(5):160-2.
208. Van der Weide K, van der Weide J. *J Clin Psychopharmacol*. 2014;34(2):256-60.
209. Van der Weide K, van der Weide J. *J Clin Psychopharmacol*. 2015;35(3):228-36.
210. Venkatakrishnan K, von Moltke LL, Greenblatt DJ. *J Clin Pharmacol*. 1999;39(6):567-77.
211. Volotinen M, Turpeinen M, Tolonen A, et al. *Drug Metab Dispos*. 2007;35(7):1135-41.
212. Von Moltke LL, Greenblatt DJ, Granda BW, et al. *Br J Clin Pharmacol*. 1999;48(1):89-97.
213. Waade RB, Hermann M, Moe HL, et al. *Eur J Clin Pharmacol*. 2014;70:933-40.
214. Wang JH, Liu ZQ, Wang W, et al. *Clin Pharmacol Ther*. 2001;70(1):42-7.
215. Wang JS, Wang W, Xie HG, et al. *Br J Clin Pharmacol*. 1997;44(2):195-8.
216. Wang LZ, Ramirez J, Yeo W, et al. *PLoS ONE*. 2013;8(1):1-10.
217. Wang RW, Liu L, Cheng H. *Drug Metab Dispos*. 1996;24(7):786-791.
218. Wen B, Ma L, Zhu M. *Chemico-Biological Interactions*. 2008;173(1):59-67.
219. Wilke RA, Ramsey LB, Johnson SG, et al. *Clin Pharmacol Ther*. 2012;92(1):112-7.
220. Williams JA, Hyland R, Jones BC, et al. *Drug Metab Dispos*. 2004;32(11):1201-8.
221. Wire MB, McLean HB, Pendry C, et al. *Antimicrobial Agents Chemother*. 2012;56(6):2846-51.
222. Won E, Chang H, Lee H, et al. *Neuropsychobiology*. 2012;66(4):221-9.
223. Wu WD, Wang Y, Fang YM, et al. *Mol Diagn Ther*. 2009;13(5):331-7.
224. Xing Q, Qian X, Li H, et al. *Inter J Neuropsychopharm*. 2007;10:631-7.
225. Yanagihara Y, Kariya S, Ohtani M, et al. *Drug Metab Dispos*. 2001;29(6):887-90.
226. Yoshimura R, Umene-Nakano W, Suzuki A, et al. *Human Psychopharmacology*. 2009;24(6):489-94.
227. Yu Y, Tsai S, Chen T, et al. *Mol Psychiatry*. 2002;7(10):1115-9.
228. Yuan R, Zhang X, Deng Q, et al. *Clinica Chimica Acta*. 2011;412(9):755-60.
229. Yumibe N, Huie K, Chen KJ, et al. *Biochem Pharmacol*. 1996;51:165-172.
230. Yun W, Zhang F, Hu C, et al. *Epilepsy Res*. 2013;107(3):231-7.
231. Zanardi R, Serretti A, Rossini D, et al. *Biol Psychiatry*. 2001;50(5):323-30.
232. Zeng Z, Andrew NW, Arison BH, et al. *Xenobiotica*. 1998;28(3):313-21.
233. Zhang HN, He XL, Wang C, et al. *Pediatr Blood Cancer*. 2014;61(12):2203-7.
234. Zhang W, Chang Y, Kan Q, et al. *Eur J Clin Pharmacol*. 2010;66(1):61-6.
235. Zhang W, Chang YZ, Kan QC, et al. *Anaesthesia*. 2010;65(2):130-35.
236. Zhang W, Yuan JJ, Kan QC, et al. *Eur J Anaesthesiol*. 2011;28(4):245-50.
237. Zhu M, Zhao W, Jimenez H, et al. *Drug Metab Dispos*. 2005;33(4):500-7.
238. Zhuo X, Zheng N, Felix CA, et al. *Drug Metab Dispos*. 2004;32(9):993-1000.
